# Supplementary material
Source: MDPI journal article supplement (https://www.mdpi.com/2075-4701/13/6/1095)
Supplement: s1 [file s1 › metals-2396027-supplementary.pdf]

SUPPLEMENTARY INFORMATION  
for

**Development of Zn-Mg-Ca Biodegradable Dual-Phase Alloys**

Koji Hagihara <sup>1,2,\*</sup>, Shuhei Shakudo <sup>3</sup>, Toko Tokunaga <sup>1</sup>, Takayoshi Nakano <sup>2</sup>

<sup>1</sup> Department of Physical Science and Engineering, Nagoya Institute of Technology,  
Nagoya 466-8555, Japan; tokunaga@nitech.ac.jp

<sup>2</sup> Division of Materials and Manufacturing Science, Graduate School of Engineering,  
Osaka University, Suita 565-0871, Japan; nakano@mat.eng.osaka-u.ac.jp

<sup>3</sup> Department of Adaptive Machine Systems, Graduate School of Engineering, Osaka  
University, Suita 565-0871, Japan

**\*Corresponding:** hagihara@nitech.ac.jp

† Current Address: Mobility Technology Center, Marketing & Technology Division,  
UACJ Corporation, Nagoya 455-8760, Japan.

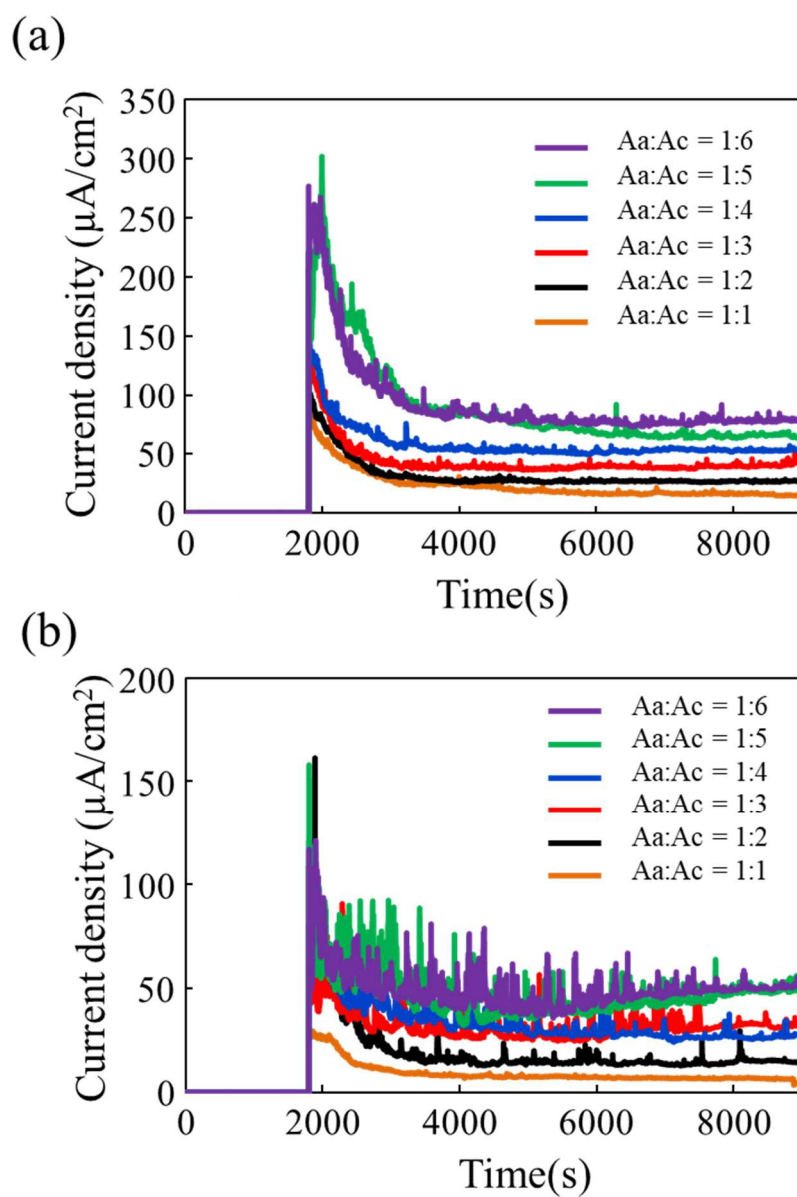

### Supplementary Figure S1

Typical variations in current densities measured between the anodic IM3- $\text{Ca}_2\text{Mg}_5\text{Zn}_{13}$  phase and cathodic IM1 phase with composition of  $\text{Ca}_3\text{Mg}_7\text{Zn}_8$  and (b)  $\text{Ca}_3\text{Mg}_{4.6}\text{Zn}_{10.4}$ , depending on the area fraction of cathodic IM1 phase electrode with respect to anodic IM3 phase.

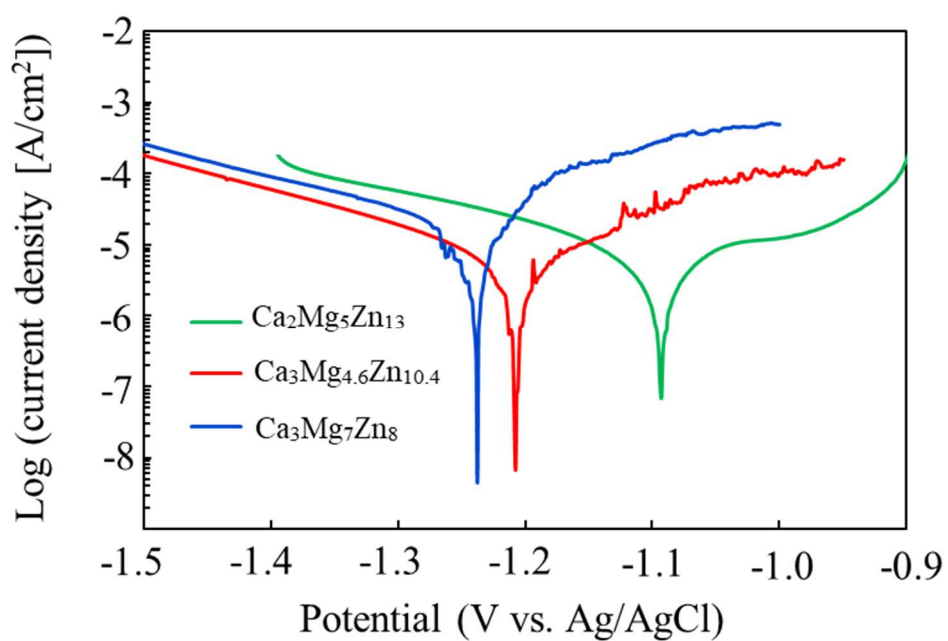

### Supplementary Figure S2

The polarization curves of the IM3-Ca<sub>2</sub>Mg<sub>5</sub>Zn<sub>13</sub>, IM1-Ca<sub>3</sub>Mg<sub>7</sub>Zn<sub>8</sub> and IM1-Ca<sub>3</sub>Mg<sub>4.6</sub>Zn<sub>10.4</sub> phases, used for the evaluation of the galvanic current density shown in Supplementary Figure S1.

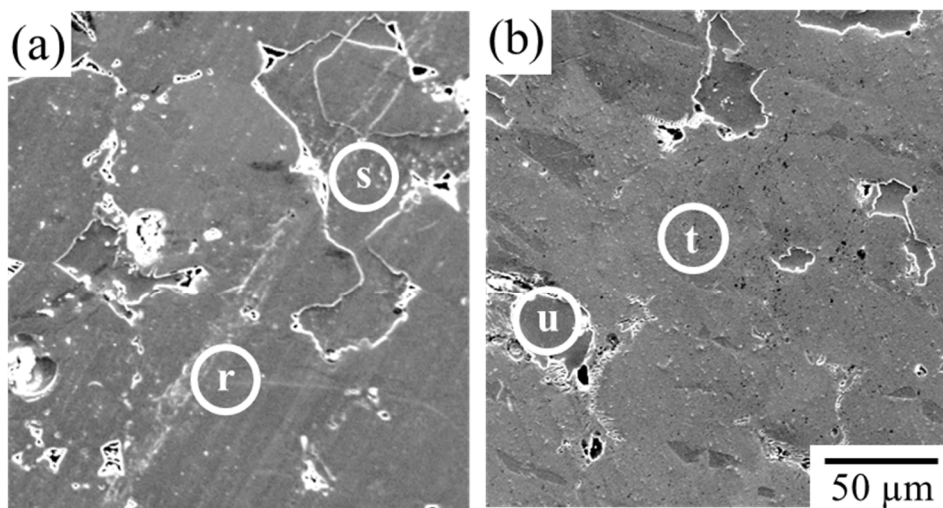

(c)

|       | Sample I |      | Sample J |      |
|-------|----------|------|----------|------|
|       | r        | s    | t        | u    |
| Ca    | 9.5      | 13.8 | 9.6      | 13.4 |
| Mg    | 19.2     | 24.5 | 17.5     | 19.9 |
| Zn    | 71.3     | 61.7 | 72.9     | 66.7 |
| phase | IM3      | IM1  | IM3      | IM1  |

### Supplementary Figure S3

(a, b) SEM images showing the microstructures in the prepared alloys: (a) Sample I and (b) Sample J. (c) Compositions in at.% examined by SEM-EDS at the points indicated in Figure S3(a, b) and the expected constituent phases in the alloys.

**Supplementary Table S1**

Composition of the Hanks' balanced salt solution used in this study (Gibco, US, No.14025).

| Reagents                                     | mg/L | mM     |
|----------------------------------------------|------|--------|
| CaCl <sub>2</sub> (anhydrous)                | 140  | 1.261  |
| MgCl <sub>2</sub> -6H <sub>2</sub> O         | 100  | 0.4926 |
| MgSO <sub>4</sub> -7H <sub>2</sub> O         | 100  | 0.4065 |
| KCl                                          | 400  | 5.333  |
| KH <sub>2</sub> PO <sub>4</sub>              | 60   | 0.4412 |
| NaHCO <sub>3</sub>                           | 350  | 4.167  |
| NaCl                                         | 8000 | 137.93 |
| Na <sub>2</sub> HPO <sub>4</sub> (anhydrous) | 48   | 0.3380 |
| D-Glucose                                    | 1000 | 5.556  |
